# Supplementary material for: Allele-Specific Disruption of a Common STAT3 Autosomal Dominant Allele Is Not Sufficient to Restore Downstream Signaling in Patient-Derived T Cells
Source: MDPI journal article supplement (doi:10.3390/genes13101912), 2022-10-20
Supplement: s1 [file s1]

# Supplementary Material

## Allele-specific disruption of a common *STAT3* autosomal dominant allele is not sufficient to restore downstream signaling in patient-derived T cells

Saskia König, Markus Hildenbeutel, Manfred Fliegau, Bodo Grimbacher, Tatjana I. Cornu, Toni Cathomen, and Claudio Mussolino

|                         |                                           |
|-------------------------|-------------------------------------------|
| Supplementary Figure S1 | Transfection efficiency                   |
| Supplementary Figure S2 | <i>In vitro</i> cleavage assay            |
| Supplementary Figure S3 | Functional measurement of STAT3 signaling |
| Supplementary Table S1  | Sequences of primers used in this study   |
| Supplementary Table S2  | Copy number estimation                    |



Koenig et al – Supplementary Figure S1

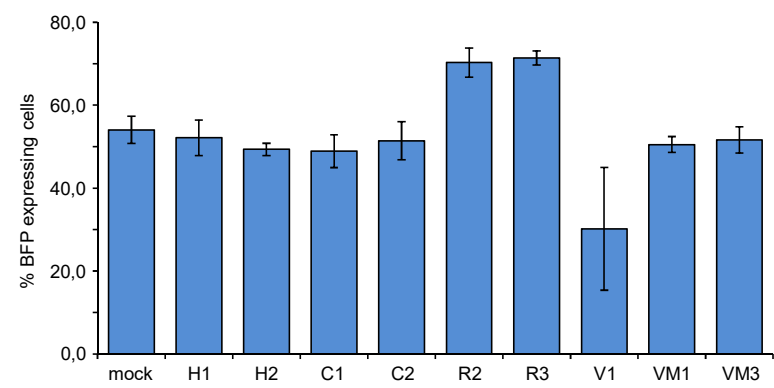

**Supplementary Figure S1. Transfection efficiency.** The histogram shows the percentage of BFP-positive cells, as measured by flow cytometry 24 hours after transfection. Experiments were performed at least in triplicates



Koenig et al – Supplementary Figure S2

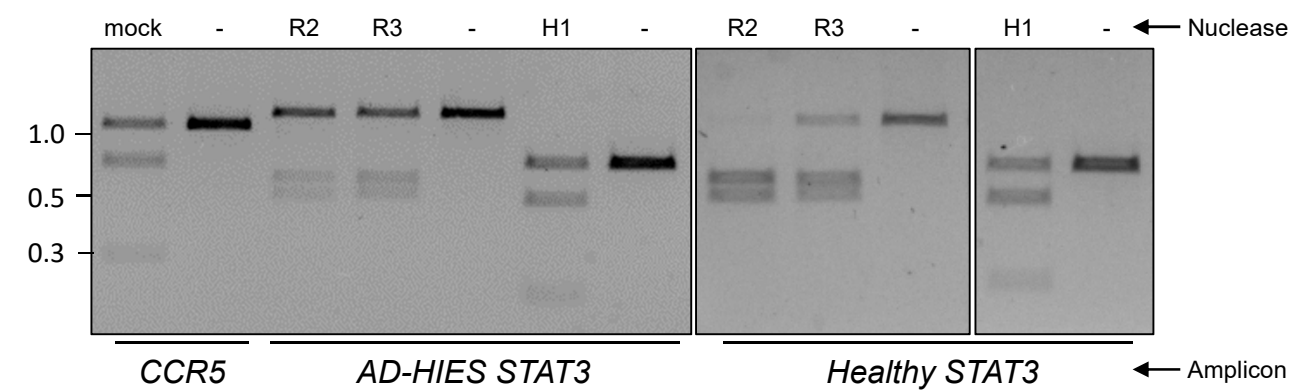

**Supplementary Figure S2. *In vitro* cleavage assay.** The Cas9 protein and the synthetic sgRNA indicated on top were mixed with the corresponding DNA fragment indicated below the image. The components were incubated at 37°C for 90 minutes before reaction was stopped by the addition of RNase A and Proteinase K. A nuclease targeted to the CCR5 gene was included as positive control. -: negative control in which both the Cas9 protein and the corresponding sgRNAs were omitted. DNA-ladder (in kb) is indicated on the left.



Koenig et al – Supplementary Figure S3

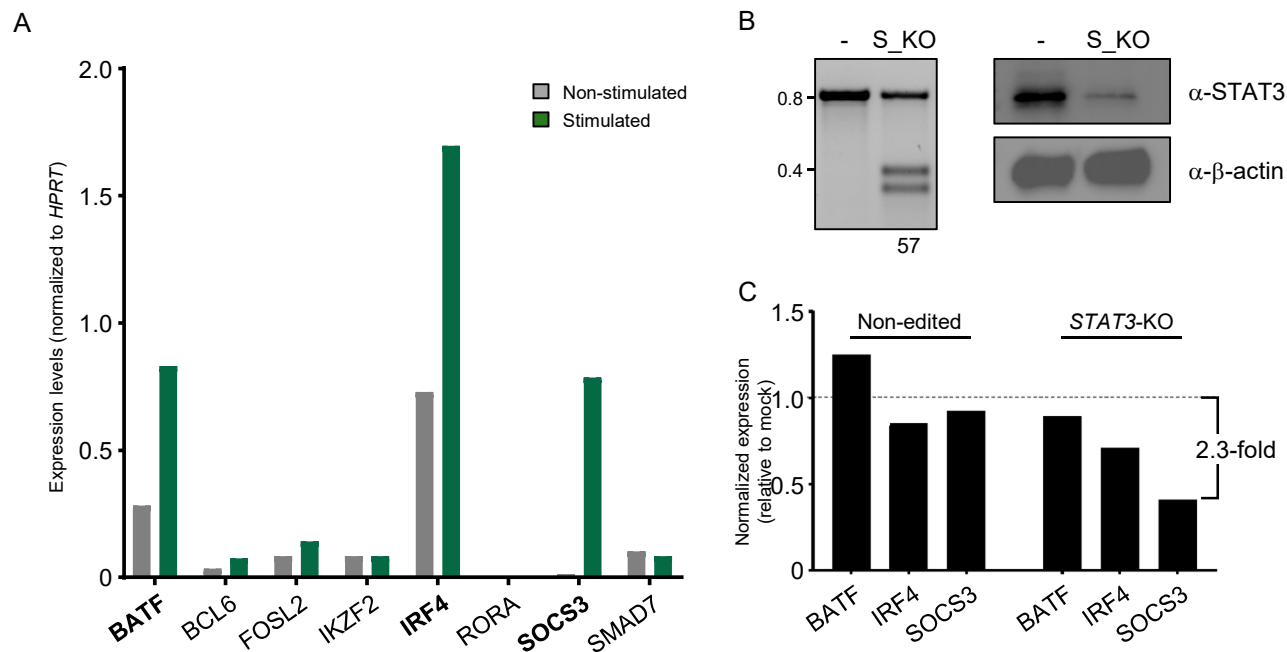

**Supplementary Figure S3. Functional measurement of STAT3 signaling.** (A) PBMCs of healthy donors were stimulated with IL-21 for 1 hour prior measuring the expression levels of STAT3 downstream transcriptional targets via droplet digital PCR. The targets that respond to STAT3 activation in the culture condition tested were selected for subsequent experiments (bold). (B) A CRISPR-Cas9 targeted to exon 21 of the *STAT3* gene (*S\_KO*) was used to artificially knock out STAT3 in healthy PBMCs. Efficacy of target gene disruption was assessed at the genomic level, via T7E1 assay (left), or protein level, via western blotting (right). (C) The expression levels of selected STAT3 transcriptional targets were measured via droplet digital PCR upon stimulation with IL-21 for 1 hour. The histogram shows the expression level of each gene, normalized to HPRT1, in the sample indicated (top) relative to a sample receiving an unrelated *CCR5*-specific CRISPR-Cas9 used as a negative control (mock).



Supplementary Table S1. Sequences of primers used in this study

| Sequence (5'--> 3') <sup>a, b</sup> | Purpose       | ID                   |
|-------------------------------------|---------------|----------------------|
| acaccGAGATTATaAAACACCAAAGg          | Oligo-cloning | sgRNA H58Y (H1)      |
| <i>aaaacCTTTGGTGTtTAATCTCg</i>      | Oligo-cloning |                      |
| acaccGATTATaAAACACCAAAGg            | Oligo-cloning | sgRNA H58Y (H1_19)   |
| <i>aaaacCTTTGGTGTtTAATCg</i>        | Oligo-cloning |                      |
| acaccGATTATaTAACACCAAAGg            | Oligo-cloning | sgRNA H58Y (H1_19-1) |
| <i>aaaacCTTTGGTGTtTAATCg</i>        | Oligo-cloning |                      |
| acaccGATTATaATACACCAAAGg            | Oligo-cloning | sgRNA H58Y (H1_19-2) |
| <i>aaaacCTTTGGTGTtTAATCg</i>        | Oligo-cloning |                      |
| acaccGATTATaAATCACCAAAGg            | Oligo-cloning | sgRNA H58Y (H1_19-3) |
| <i>aaaacCTTTGGTGATTtTAATCg</i>      | Oligo-cloning |                      |
| acaccGATTAAaAAACACCAAAGg            | Oligo-cloning | sgRNA H58Y (H1_19+1) |
| <i>aaaacCTTTGGTGTtTTAATCg</i>       | Oligo-cloning |                      |
| acaccGATTTTaAAACACCAAAGg            | Oligo-cloning | sgRNA H58Y (H1_19+2) |
| <i>aaaacCTTTGGTGTtTTAAATCg</i>      | Oligo-cloning |                      |
| acaccGATAATaAAACACCAAAGg            | Oligo-cloning | sgRNA H58Y (H1_19+3) |
| <i>aaaacCTTTGGTGTtATTATCg</i>       | Oligo-cloning |                      |
| acaccCAGGAGATTATaAAACACCAg          | Oligo-cloning | sgRNA H58Y (H2)      |
| <i>aaaacTGGTGTtTAATCTCCTGg</i>      | Oligo-cloning |                      |
| acaccGGAGATTATaAAACACCAg            | Oligo-cloning | sgRNA H58Y (H2_19)   |
| <i>aaaacTGGTGTtTAATCTCCg</i>        | Oligo-cloning |                      |
| acaccATGGGCATGCAGGGCATGCag          | Oligo-cloning | sgRNA C3dup (C1)     |
| <i>aaaacTGCATGCCCTGCATGCCATg</i>    | Oligo-cloning |                      |
| acaccCATGGGCATGCAGGGCATGCg          | Oligo-cloning | sgRNA C3dup (C2)     |
| <i>aaaacGCATGCCCTGCATGCCATGg</i>    | Oligo-cloning |                      |
| acaccCAGATGTTGGAGATCACAACg          | Oligo-cloning | sgRNA V4delta (V1)   |
| <i>aaaacGTTGTGATCTCCAACATCTGg</i>   | Oligo-cloning |                      |
| acaccGATGTTGGAGATCACAACg            | Oligo-cloning | sgRNA V4delta (V2)   |
| <i>aaaacGTTGTGATCTCCAACATCg</i>     | Oligo-cloning |                      |
| acaccTAAGACCCAGATCCAGTCCag          | Oligo-cloning | sgRNA V637M (VM1)    |
| <i>aaaacTGGACTGGATCTGGGTCTTAg</i>   | Oligo-cloning |                      |
| acaccGGTTCATGGACTGGATCg             | Oligo-cloning | sgRNA V637M (VM3)    |
| <i>aaaacGATCCAGTCCATGGAACCg</i>     | Oligo-cloning |                      |
| acaccGCCCAGAATGTTAAATTTcG           | Oligo-cloning | sgRNA R382W (R1_19)  |
| <i>aaaacGAAATTTAACATTCTGGGCg</i>    | Oligo-cloning |                      |
| acaccATCCTGGAATTTAACATTcG           | Oligo-cloning | sgRNA R382W (R2)     |
| <i>aaaacGAATGTTAAATTTCCAGGATg</i>   | Oligo-cloning |                      |
| acaccGTCCTGGAATTTAACATTcG           | Oligo-cloning | sgRNA R382W (R2_19)  |
| <i>aaaacGAATGTTAAATTTCCAGGACg</i>   | Oligo-cloning |                      |
| acaccGCCTGGAATTTAACATTcG            | Oligo-cloning | sgRNA R382W (R2_18)  |
| <i>aaaacGAATGTTAAATTTCCAGGCg</i>    | Oligo-cloning |                      |
| acaccGCTGGAATTTAACATTcG             | Oligo-cloning | sgRNA R382W (R2_17)  |
| <i>aaaacGAATGTTAAATTTCCAGCg</i>     | Oligo-cloning |                      |
| acaccTTAAATTTCCAGGATCCTCTg          | Oligo-cloning | sgRNA R382W (R3)     |
| <i>aaaacAGAGGATCCTGGAAATTTAAg</i>   | Oligo-cloning |                      |
| acaccGTAATTTCCAGGATCCTCTg           | Oligo-cloning | sgRNA R382W (R3_19)  |
| <i>aaaacAGAGGATCCTGGAAATTTACg</i>   | Oligo-cloning |                      |
| acaccGAAATTTCCAGGATCCTCTg           | Oligo-cloning | sgRNA R382W (R3_18)  |
| <i>aaaacAGAGGATCCTGGAAATTTcG</i>    | Oligo-cloning |                      |
| acaccGAATTTCCAGGATCCTCTg            | Oligo-cloning | sgRNA R382W (R3_17)  |



| <i>aaaac</i> AGAGGATCCTGGAAATTC <i>g</i> | Oligo-cloning | sgRNA R502W (R5_17) |
|------------------------------------------|---------------|---------------------|
| CCCTGGCGTCGTGATTAG                       | ddPCR         | HPRT1-4406          |
| CATGAGGAATAAACACCCCTTTCC                 | ddPCR         | HPRT1-4407          |
| CTTCGATTCGGGACCAGCC                      | ddPCR         | SOCS3-4428          |
| CGGAGCCAGCGTGGATC                        | ddPCR         | SOCS3-4429          |
| ATGCTTGTGCCCCACCTG                       | ddPCR         | IRF4-4424           |
| GTGCAGCCGGCAGTCTG                        | ddPCR         | IRF4-4425           |
| CCCTGGCAAACAGGACTC                       | ddPCR         | BATF-4416           |
| GGTCTTCGCTCTCCAGGTG                      | ddPCR         | BATF-4417           |
| GATGAATGGGTTATAGCATCAGGTTTGCTTTG         | NGS           | H58Y-4024           |
| <i>GTCTGTCTTCTCCTTGTCTCAGT</i>           | NGS           | H58Y-4025           |
| TTAGCATCCTTGTCCCTTCCCTC                  | NGS           | C3dup-4205          |
| <i>AGAATGACCCTGGCCACCAAC</i>             | NGS           | C3dup-4206          |
| ACTCCTCGCCTAGAGTTGGCA                    | NGS           | V4delta-4207        |
| <i>TACTAGGTACCCCTAAGTCGCAAG</i>          | NGS           | V4delta-4208        |
| CAGGGTGTTCAAGGTCTCAACACT                 | NGS           | V637M-4203          |
| ACTTTCCGAATGCCTCCTCTTG                   | NGS           | V637M-4204          |

<sup>a</sup> Overhangs are indicated in small letters while the sgRNA sequence in capital letters.

<sup>b</sup> ODNs annealing on the reverse DNA strand are indicated in italics.



**Supplementary Table S2. Copy number estimation**

| Cell type                | Gene ID         | Concentration<br>(copies/ $\mu$ l) | Genomic copies<br>to PTPB2 in PBMCs) | (rel. |
|--------------------------|-----------------|------------------------------------|--------------------------------------|-------|
| PBMC                     | <i>PTBP2</i>    | 295,0                              |                                      | 2,0   |
|                          | <i>Reporter</i> | 10,3                               |                                      | 0,1   |
|                          | <i>STAT3</i>    | 354,0                              |                                      | 2,4   |
| HEK293T                  | <i>PTBP2</i>    | 436,0                              |                                      | 3,0   |
|                          | <i>Reporter</i> | 8,6                                |                                      | 0,1   |
|                          | <i>STAT3</i>    | 519,0                              |                                      | 3,5   |
| HEK293Tmut<br>(clone #2) | <i>PTBP2</i>    | 394,0                              |                                      | 2,7   |
|                          | <i>Reporter</i> | 396,0                              |                                      | 2,7   |
|                          | <i>STAT3</i>    | 531,0                              |                                      | 3,6   |
| HEK293Tmut<br>(clone #7) | <i>PTBP2</i>    | 444,0                              |                                      | 3,0   |
|                          | <i>Reporter</i> | 229,0                              |                                      | 1,6   |
|                          | <i>STAT3</i>    | 577,0                              |                                      | 3,9   |
